# Supplementary material
Source: HighWire-hosted journal article supplement (https://jnnp.bmj.com/highwire/filestream/185242/field_highwire_adjunct_files/0/Supptable222836.xls)
Supplement: Supptable222836.xls [file Supptable222836.xls]

## Sheet: Supplementary table
Supplementary table Clinical profiles of acute ataxic neuropathy without ophthalmoplegia and Fisher syndrome
				Acute ataxic neuropathy without ophthalmplegia								Fisher syndrome
				Total		Romberg sign						Total		Romberg sign
						Negative		Positive						Negative		Positive
Number of patients				54		37		17				466		429		37
Antecedent illness: n (%)
	Upper respiratory tract symptoms only			23 (52%)		12 (43%)		10 (59%)				277 (65%)		258 (65%)		19 (59%)
	Diarrhea only			08 (18%)		04 (14%)		04 (24%)				051 (12%)		047 (12%)		04 (13%)
	Both			03 (7%)		03 (11%)		00 (0%)				055 (13%)		050 (13%)		05 (16%)
	Other			03 (7%)		05 (18%)		00 (0%)				010 (2%)		008 (2%)		02 (6%)
	None			07 (16%)		04 (14%)		03 (17%)				034 (8%)		032 (8%)		02 (6%)
Initial symptom: n (%)
	Dysesthesia			31 (70%)		19 (51%)		12 (71%)				065 (14%)		058 (14%)		07 (19%)
	Gait disturbance			24 (44%)		18 (49%)		06 (35%)				149 (32%)		134 (31%)		15 (41%)
	Diplopia			07 (13%)		07 (19%)		00 (0%)				303 (65%)		279 (65%)		24 (65%)
	Limb weakness			02 (4%)		02 (5%)		00 (0%)				009 (2%)		009 (2%)		00 (0%)
	Blepharoptosis			01 (2%)		01 (3%)		00 (0%)				019 (4%)		019 (4%)		00 (0%)
Median days to nadir (range)				05 (2-15)		04 (2-15)		07 (3-13)				004 (1-20)		004 (1-13)		04 (3-20)
Assisted ventilation: n (%)				00 (0%)		00 (0%)		00 (0%)				005 (1%)		004 (1%)		01 (3%)
